# Supplementary material for: Let There Be Light: Genome Reduction Enables Bacillus subtilis to Produce Disulfide-Bonded Gaussia Luciferase
Source: PubMed Central journal article supplement (PMC10729301; doi:10.1021/acssynbio.3c00444), 2023-11-27
Supplement: sb3c00444_si_001.pdf [file sb3c00444_si_001.pdf]

## Supplementary Materials

# Let There Be Light: Genome-reduction Enables *Bacillus subtilis* to Produce Disulfide-bonded *Gaussia* Luciferase

Tobias Schilling<sup>1</sup>, Borja Ferrero-Bordera<sup>2</sup>, Jolanda Neef<sup>1</sup>, Sandra Maaß<sup>2</sup>, Dörte Becher<sup>2</sup>, and Jan Maarten van Dijl<sup>1\*</sup>

<sup>1</sup> University of Groningen, University Medical Center Groningen, Department of Medical Microbiology, Hanzeplein 1, P.O. Box 30001, 9700RB Groningen, The Netherlands

<sup>2</sup> University of Greifswald, Institute of Microbiology Department of Microbial Proteomics, D-17489 Greifswald, Germany

\* To whom correspondence should be addressed: Tel. +31503615187; Email: [j.m.van.dijl01@umcg.nl](mailto:j.m.van.dijl01@umcg.nl)

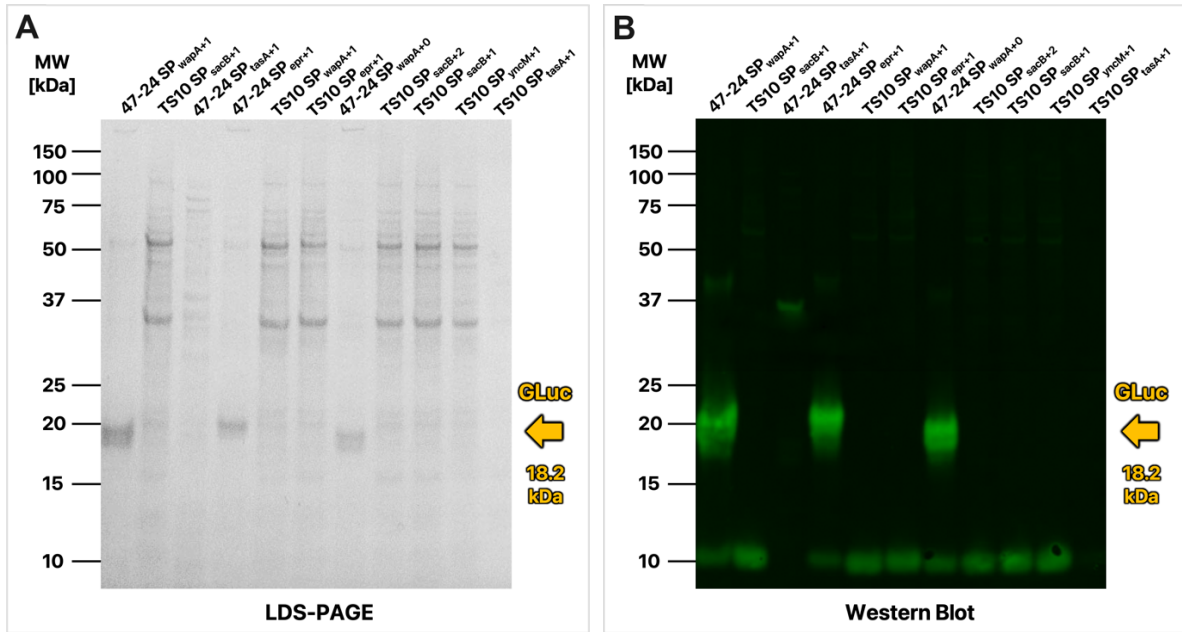

**Supplementary Figure S1: Signal peptide screening for GLuc secretion by *B. subtilis*.** Cells of *B. subtilis* TS10 or IIG-Bs27-47-24 producing GLuc with N-terminal signal peptide fusions as indicated were separated from the growth medium by centrifugation after 16 h of growth in LB medium at 37°C. Subsequently, proteins in the supernatant fractions were separated by LDS-PAGE, and visualized by staining with Coomassie (A) or by Western blotting using specific antibodies against GLuc (B). The expected position of mature GLuc in the LDS-PAGE and Western blot is indicated with an arrow.

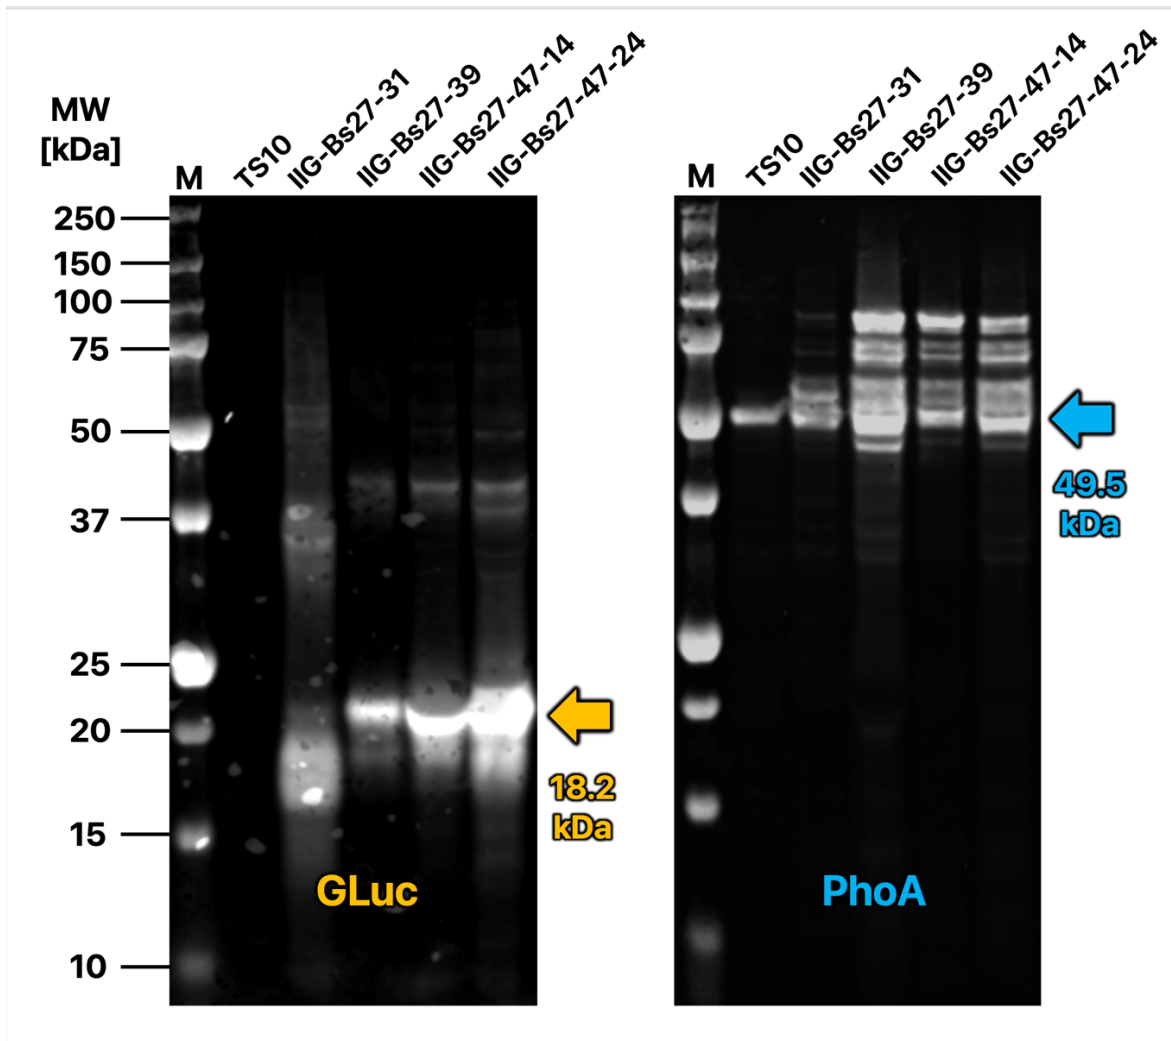

**Supplementary Figure S2: Benchmark of different genome-minimized strains producing GLuc or PhoA.** Culture supernatant samples from four different genome-minimized *B. subtilis* strains and the reference strain TS10, producing either GLuc or PhoA, were separated by LDS-PAGE and analyzed Western blotting with specific antibodies against GLuc or PhoA, respectively. As opposed to the blots shown in Fig. 2B in the main manuscript, these blots were not incubated with an antibody against TrxA to visualize possible cell lysis.

**Supplementary Table S1:** Oligonucleotides used in this study.

| Oligonucleotide Name | Sequence                                                                 |
|----------------------|--------------------------------------------------------------------------|
| TS101                | tacgGATAAATAGGAAATGAGACT                                                 |
| TS102                | AAACAGTCTCATTTCCTATTTATC                                                 |
| TS103                | CGACGGCCAACGAGGtaatatgttacatggccatcaaacat                                |
| TS104                | gctagcggcaaattccgcatgatgt                                                |
| TS105                | ggaattggcgtagctttttattttaaaaaattg                                        |
| TS106                | atattgggtgggaggatttcgtgccg                                               |
| RH001                | AGCTTAGGCCAGTCGAAAG                                                      |
| RH002                | CAGCTAGGAGGTGACTGAAG                                                     |
| RH003                | ACCGAGCGTTCTGAACAAATCC                                                   |
| pBSMul1.fw           | GATATCTCCTCCTTATTATGTAAATCGCTCC                                          |
| pBSMul1.rev          | TCTAGAGGTCGAAATTCACCTCGAAAGC                                             |
| GLuc JN.fw           | TAAGGAGGAGATATCAAACCAACTGAAAAC                                           |
| GLuc JN.rev          | ATTTGCACCTCTAGATTAATCACCACCGCACCTTTATTTGTCCACTTG                         |
| eprJN.fw             | GTTTTCAGTTGGTTTGCTGTTTTGCGCATGAGCGAGAGGgcctatgg                          |
| eprJN.rev            | CCTCTCGCTCATGCGAAACCAACTGAAAAC                                           |
| epr+1AAJN.rev        | GTTTTCAGTTGGTTTGCTGTTTTGCGCATGAGCGAGAGGgcctatgg                          |
| epr+2AAJN.rev        | GTTTTCAGTTGGTTTGCTGTTTTGCGCATGAGCGAGAGGgcctatgg                          |
| epr+3AAJN.rev        | GTTTTCAGTTGGTTTGCTGTTTTGCGCATGAGCGAGAGGgcctatgg                          |
| epr-GLucJN+0AA.fw    | CCTCTCGCTCATGCGAAACCAACTGAAAAC                                           |
| epr-GLucJN+1AA.fw    | CCTCTCGCTCATGCGAAAAACCAACTGAAAACAATGAAGATTTCAACATTGTAGCTG<br>TAGC        |
| epr-GLucJN+2AA.fw    | CCTCaTCGCTCATGCGAAAAACCAACTGAAAACAATGAAGATTTCAACATTGTA<br>GCTGTAGC       |
| epr-GLucJN+3AA.fw    | CCTCTCGCTCATGCGAAAAACAGCAAACCAACTGAAAACAATGAAGATTTCAACATT<br>GTAGCTGTAGC |
| WapAJN.fw            | TAAGGAGGAGATATCATGAAAAAAGAAAGAGGGCGAAACTTTAAAAGGTTTCATTGC<br>AGC         |
| wapA+0AAJN.rev       | CATTGTTTTCAGTTGGTTTGCTAGTACATCGGCTGGCACTAATGAAATCATTAAAGC<br>C           |
| wapA+1AAJN.rev       | CATTGTTTTCAGTTGGTTTTTTGCTAGTACATCGGCTGGCACTAATGAAATCATTAAA<br>GCC        |
| wapA+2AAJN.rev       | CATTGTTTTCAGTTGGTTTAGATTTTGCTAGTACATCGGCTGGCACTAATGAAATCATT<br>AAAGCC    |

|                    |                                                                                 |
|--------------------|---------------------------------------------------------------------------------|
| wapA+3AAJN.rv      | CATTGTTTTAGTTGGTTTTGTAGATTTGCTAGTACATCGGCTGGCACTAATGAAATC<br>ATTAAGCC           |
| wapA-GLuc+0JN.fw   | GCCAGCCGATGTACTAGCAAAACCAACTGAAAAAATGAAGATTTCAACATTGTAGC<br>TGTAGCTAGC          |
| wapA-GLuc+1JN.fw   | GCCAGCCGATGTACTAGCAAAAAACCAACTGAAAAAATGAAGATTTCAACATTGT<br>AGCTGTAGCTAGC        |
| wapA-GLuc+2JN.fw   | GCCAGCCGATGTACTAGCAAAATCTAAACCAACTGAAAAAATGAAGATTTCAACAT<br>TGTAGCTGTAGCTAGC    |
| wapA-GLuc+3JN.fw   | GCCAGCCGATGTACTAGCAAAATCTacaAAACCAACTGAAAAAATGAAGATTTCAAC<br>ATTGTAGCTGTAGCTAGC |
| sacBJN.fw          | TAAGGAGGAGATATCATGAACATCAAAAAGTTTGCAAAAAAAGCAACAGTATTAACC<br>TTTACTaccgc        |
| sacBJN.rv          | TCATTGTTTTAGTTGGTTTTCGCAAACGCTTGAGTTGCGCCTCC                                    |
| sacB+1AAJN.rv      | TCATTGTTTTAGTTGGTTTTTTTCGCAAACGCTTGAGTTGCGCCTCC                                 |
| sacB+2AAJN.rv      | TCATTGTTTTAGTTGGTTTTCTTTTCGCAAACGCTTGAGTTGCGCCTCC                               |
| sacB+3AAJN.rv      | TCATTGTTTTAGTTGGTTTTCGTTTTCTTTTCGCAAACGCTTGAGTTGCGCCTCC                         |
| sacB_GLucJN.fw     | GCAACTCAAGCGTTTGCGAAACCAACTGAAAAAATGAAGATTTCAACATTGTAGCT<br>GTAGCTAGC           |
| sacB_GLuc+1JN.fw   | GCAACTCAAGCGTTTGCGaaaAAACCAACTGAAAAAATGAAGATTTCAACATTGTAG<br>CTGTAGCTAGC        |
| sacB_GLuc+2JN.fw   | GCAACTCAAGCGTTTGCGAAAGAAAAACCAACTGAAAAAATGAAGATTTCAACATT<br>GTAGCTGTAGCTAGC     |
| sacB_GLuc+3.fw     | GCAACTCAAGCGTTTGCGAAAGAAACGAAACCAACTGAAAAAATGAAGATTTCAAC<br>ATTGTAGCTGTAGCTAGC  |
| yncMJN.fw          | CATAATAAGGAGGAGATATCATGGCGAAACCACTATCAAAGGGGGAATTTTGG                           |
| yncM.rv            | CTTCATTGTTTTAGTTGGTTTTGCTTTTTCGCACTTGAGCGTCTGCCG                                |
| yncM+1JN.rv        | CTTCATTGTTTTAGTTGGTTTTGCTGCTTTTTCGCACTTGAGCGTCTGCCG                             |
| yncM+2JN.rv        | CTTCATTGTTTTAGTTGGTTTTGGATGCTGCTTTTTCGCACTTGAGCGTCTGCCG                         |
| yncM+3JN.rv        | CTTCATTGTTTTAGTTGGTTTTCTCGGATGCTGCTTTTTCGCACTTGAGCGTCTGCCG                      |
| yncM_GLucJN.fw     | CAAGTCGCAAAAGCAAAACCAACTGAAAAAATGAAGATTTCAACATTGTAGCTGTA<br>GC                  |
| yncM_GLuc+1AAJN.fw | CAAGTCGCAAAAGCAGCAAAACCAACTGAAAAAATGAAGATTTCAACATTGTAGCT<br>GTAGC               |
| yncM_GLuc+2AAJN.fw | CAAGTCGCAAAAGCAGCATCAAACCAACTGAAAAAATGAAGATTTCAACATTGTA<br>GCTGTAGC             |
| yncM_GLuc+3AAJN.fw | CAAGTCGCAAAAGCAGCATCCGAGAAACCAACTGAAAAAATGAAGATTTCAACATT<br>GTAGCTGTAGC         |
| tasAJN.fw          | TAAGGAGGAGATATCATGGGTATGAAAAAGAAATTGAGTTTAGGAGTTGCTTCTGCA                       |

|                    |                                                                              |
|--------------------|------------------------------------------------------------------------------|
|                    | GC                                                                           |
| tasAJN.rv          | TGTTTTCAGTTGGTTTTGCCCATGTTCTCCTCCAACCTAAAGCTAATCCTAG                         |
| tasA+1AAJN.rv      | TGTTTTCAGTTGGTTTTGCTGCCCATGTTCTCCTCCAACCTAAAGCTAATCCTAG                      |
| tasA+2AAJN.rv      | TGTTTTCAGTTGGTTTAAATGCTGCCCATGTTCTCCTCCAACCTAAAGCTAATCCTAG                   |
| tasA+3AAJN.rv      | TGTTTTCAGTTGGTTTGTTAAATGCTGCCCATGTTCTCCTCCAACCTAAAGCTAATCCT                  |
|                    | AG                                                                           |
| tasA_GLucJN.fw     | GGAGGAACATGGGCAAACCAACTGAAAACAATGAAGATTTCAACATTGTAGCTGT<br>AGCTAGC           |
| tasA_GLuc+1AAJN.fw | GGAGGAACATGGGCAGCAAACCAACTGAAAACAATGAAGATTTCAACATTGTAGC<br>TGTAGCTAGC        |
| tasA_GLuc+2AAJN.fw | GGAGGAACATGGGCAGCATTAAACCAACTGAAAACAATGAAGATTTCAACATTGTA<br>GCTGTAGCTAGC     |
| tasA_GLuc+3AAJN.fw | GGAGGAACATGGGCAGCATTAAACAAACCAACTGAAAACAATGAAGATTTCAACATT<br>GTAGCTGTAGCTAGC |
| pBSMullcol.fw      | GTGGTTGCCGAAAGAGCGAAAATGCCTC                                                 |
| pBSMullcol.rev     | GGAGCCTTTAATTGTATCGGTTTATCAGCTTGC                                            |

**Supplementary Table S2:** Non-processed read-out data of the GLuc and PhoA activity assays in Figures 1, 2 and 4.

| Supplementary Data for Fig. 1: GLuc Activity Assay (Light Emission at 485 nm) |                             |                             |                             |                             |                             |                             |
|-------------------------------------------------------------------------------|-----------------------------|-----------------------------|-----------------------------|-----------------------------|-----------------------------|-----------------------------|
| Signal peptide                                                                | Cell Pellet<br>Read 1 [RLU] | Cell Pellet<br>Read 2 [RLU] | Cell Pellet<br>Read 3 [RLU] | Supernatant<br>Read 1 [RLU] | Supernatant<br>Read 2 [RLU] | Supernatant<br>Read 3 [RLU] |
| [Blank]                                                                       | 5                           | 8                           | 13                          | 5                           | 8                           | 13                          |
| SP <sub>WapA+0</sub>                                                          | 3547                        | 4174                        | 3920                        | 47106                       | 53303                       | 47537                       |
| SP <sub>WapA+2</sub>                                                          | 5129                        | 4910                        | 5029                        | 16016                       | 16783                       | 16708                       |
| SP <sub>TasA+1</sub>                                                          | 3008                        | 2990                        | 3399                        | 287                         | 297                         | 374                         |
| SP <sub>Epr+1</sub>                                                           | 2807                        | 2989                        | 3354                        | 57346                       | 55438                       | 60947                       |

  

| Supplementary Data for Fig. 2C: GLuc Activity Assay (Light Emission at 485 nm) |                       |                       |                       |                             |                             |                             |                   |
|--------------------------------------------------------------------------------|-----------------------|-----------------------|-----------------------|-----------------------------|-----------------------------|-----------------------------|-------------------|
| <i>B. subtilis</i> Strain                                                      | Cells Read<br>1 [RLU] | Cells Read<br>2 [RLU] | Cells Read<br>3 [RLU] | Supernatant<br>Read 1 [RLU] | Supernatant<br>Read 2 [RLU] | Supernatant<br>Read 3 [RLU] | OD <sub>600</sub> |
| [Blank]                                                                        | 4                     | 11                    | 9                     | 26                          | 25                          | 63                          | -                 |
| TS10                                                                           | 48                    | 52                    | 53                    | 9566                        | 10717                       | 10351                       | 3.75              |
| IIG-Bs 27-31                                                                   | 341                   | 332                   | 316                   | 25561                       | 24509                       | 24232                       | 3.42              |
| IIG-Bs 27-39                                                                   | 622                   | 583                   | 689                   | 44854                       | 46494                       | 46609                       | 4.10              |
| IIG-Bs 27-47-14                                                                | 874                   | 793                   | 832                   | 82518                       | 97991                       | 107080                      | 1.97              |
| IIG-Bs 27-47-24                                                                | 1439                  | 1396                  | 1554                  | 26                          | 25                          | 63                          | 1.54              |

  

| Supplementary Data for Fig. 2D: PhoA Activity Assay (Optical Density at 405 nm) |                       |                       |                       |                       |                       |                       |                   |
|---------------------------------------------------------------------------------|-----------------------|-----------------------|-----------------------|-----------------------|-----------------------|-----------------------|-------------------|
| <i>B. subtilis</i> Strain                                                       | Cell Pellet<br>Read 1 | Cell Pellet<br>Read 2 | Cell Pellet<br>Read 3 | Supernatant<br>Read 1 | Supernatant<br>Read 2 | Supernatant<br>Read 3 | OD <sub>600</sub> |
| [Blank]                                                                         | 0                     | 0                     | 0                     | 0                     | 0                     | 0                     | -                 |
| TS10                                                                            | 1.0522                | 0.9207                | 1.0928                | 1.2783                | 1.207                 | 1.2748                | 3.825             |
| IIG-Bs 27-31                                                                    | 0.9749                | 1.1705                | 1.0493                | 1.3828                | 1.4115                | 1.4034                | 3.0965            |
| IIG-Bs 27-39                                                                    | 0.8755                | 0.6474                | 0.8746                | 1.8981                | 1.9098                | 1.9239                | 1.8915            |
| IIG-Bs 27-47-14                                                                 | 1.0272                | 1.1473                | 0.9891                | 1.1623                | 1.1616                | 1.1758                | 3.034             |
| IIG-Bs 27-47-24                                                                 | 0.4032                | 0.4138                | 0.3974                | 0.8829                | 0.8826                | 0.8841                | 1.313             |

  

| Supplementary Data for Fig. 2E: GLuc Activity Assay (Light Emission at 485 nm) |                       |                       |                       |                             |                             |                             |
|--------------------------------------------------------------------------------|-----------------------|-----------------------|-----------------------|-----------------------------|-----------------------------|-----------------------------|
| Sample Type                                                                    | Cells Read 1<br>[RLU] | Cells Read 2<br>[RLU] | Cells Read 3<br>[RLU] | Supernatant<br>Read 1 [RLU] | Supernatant<br>Read 2 [RLU] | Supernatant<br>Read 3 [RLU] |
| [Blank]                                                                        | 10                    | 5                     | 8                     | 20                          | 22                          | 14                          |
| Native                                                                         | 245                   | 3412                  | 2844                  | 173198                      | 187108                      | 196076                      |
| DTT treated                                                                    | 224                   | 298                   | 250                   | 20                          | 22                          | 14                          |

  

| Supplementary Data for Fig. 4A: GLuc Activity Assay (Light Emission at 485 nm) |                       |                       |                       |                             |                             |                             |                   |
|--------------------------------------------------------------------------------|-----------------------|-----------------------|-----------------------|-----------------------------|-----------------------------|-----------------------------|-------------------|
| <i>B. subtilis</i> Strain                                                      | Cells Read<br>1 [RLU] | Cells Read<br>2 [RLU] | Cells Read<br>3 [RLU] | Supernatant<br>Read 1 [RLU] | Supernatant<br>Read 2 [RLU] | Supernatant<br>Read 3 [RLU] | OD <sub>600</sub> |
| IIG-Bs27-39                                                                    |                       |                       |                       |                             |                             |                             |                   |
| [Blank]                                                                        | 4                     | 5                     | 11                    | 7                           | 6                           | 6                           | -                 |
| WT                                                                             | 1495                  | 1606                  | 1703                  | 65781                       | 60791                       | 66323                       | 5.56              |
| ScDsbA                                                                         | 302                   | 327                   | 342                   | 7340                        | 7550                        | 8802                        | 4.77              |
| ScDsbA                                                                         | 172                   | 199                   | 190                   | 65                          | 63                          | 45                          | 5.56              |

| $\Delta$ BdbCD                                                                  | 939        | 956        | 1026       | 37435       | 33937       | 34845       | 4.70              |
|---------------------------------------------------------------------------------|------------|------------|------------|-------------|-------------|-------------|-------------------|
| Supplementary Data for Fig. 4B: PhoA Activity Assay (Optical Density at 405 nm) |            |            |            |             |             |             |                   |
| <i>B. subtilis</i> Strain                                                       | Cells Read | Cells Read | Cells Read | Supernatant | Supernatant | Supernatant | OD <sub>600</sub> |
| IIG-Bs27-39                                                                     | 1          | 2          | 3          | Read 1      | Read 2      | Read 3      |                   |
| [Blank]                                                                         | -          | -          | -          | 0.082       | 0.081       | 0.081       | -                 |
| WT                                                                              | -          | -          | -          | 0.999       | 1.019       | 0.999       | 1.11              |
| ScDsbA                                                                          | -          | -          | -          | 0.097       | 0.097       | 0.098       | 3.16              |
| ScDsbA                                                                          | -          | -          | -          | 0.09        | 0.09        | 0.094       | 2.93              |
| $\Delta$ BdbCD                                                                  | -          | -          | -          | 0.102       | 0.103       | 0.103       | 2.16              |

RLU, relative light units
